# Supplementary material
Source: publisher figshare collection journal article supplement (https://acs.figshare.com/ndownloader/files/6518451)
Supplement: Supplementary file 1 [file 6518451]

## Supporting Information

# TEMPO-Oxidized Nanocellulose Fiber-Directed Stable Aqueous Suspension of Plasmonic Flower- like Silver Nanoconstructs for Ultra-Trace Detection of Analytes

Kallayi Nabeela,<sup>†,‡</sup> Reny Thankam Thomas,<sup>†</sup> Jyothi B. Nair,<sup>‡,§</sup> Kaustabh Kumar Maiti,<sup>‡,§</sup> Krishna  
Gopa Kumar Warriar,<sup>†</sup> and Saju Pillai<sup>\*,†,‡</sup>

Corresponding author email: [pillai\\_saju@niist.res.in](mailto:pillai_saju@niist.res.in)

<sup>†</sup> Functional Materials, Materials Science and Technology Division, and <sup>§</sup> Organic Chemistry, Chemical Science  
and Technology Division, Council of Scientific & Industrial Research (CSIR), National Institute for  
Interdisciplinary Science and Technology (NIIST), Thiruvananthapuram, Kerala 695 019, India

<sup>‡</sup> Academy of Scientific and Innovative Research (AcSIR), New Delhi-110 001, India

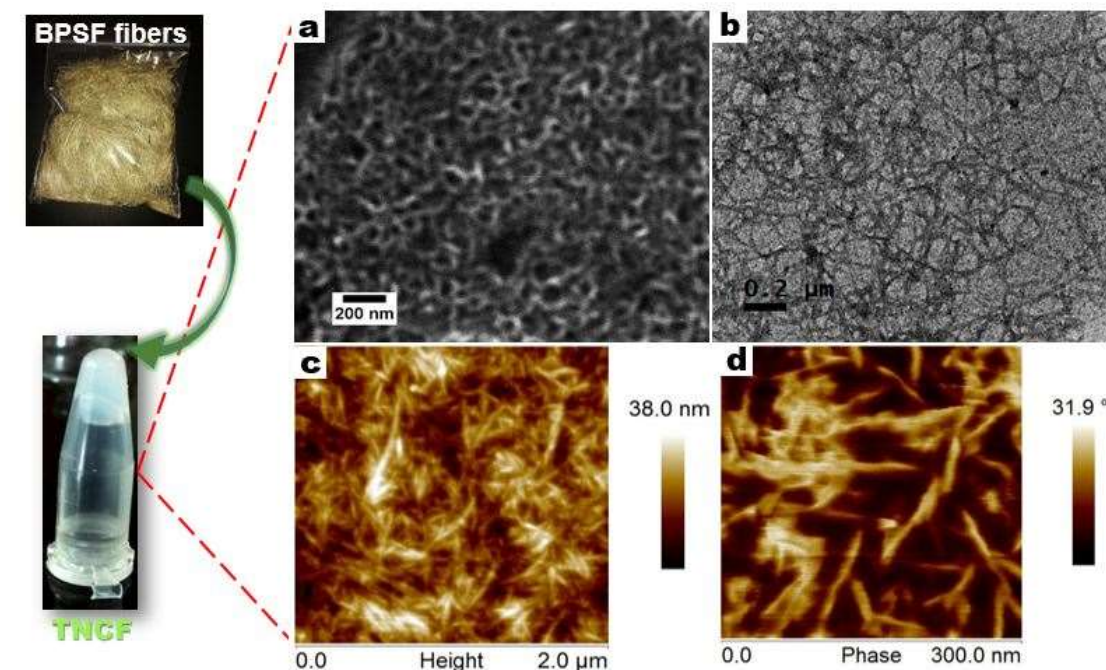

**Figure S1.** Photographs of banana fibers (left top) and T-NCF extracted from banana fibers (left bottom). (a) SEM, (b) TEM, (c) AFM height image, and (d) corresponding higher magnification phase image of T-NCF.

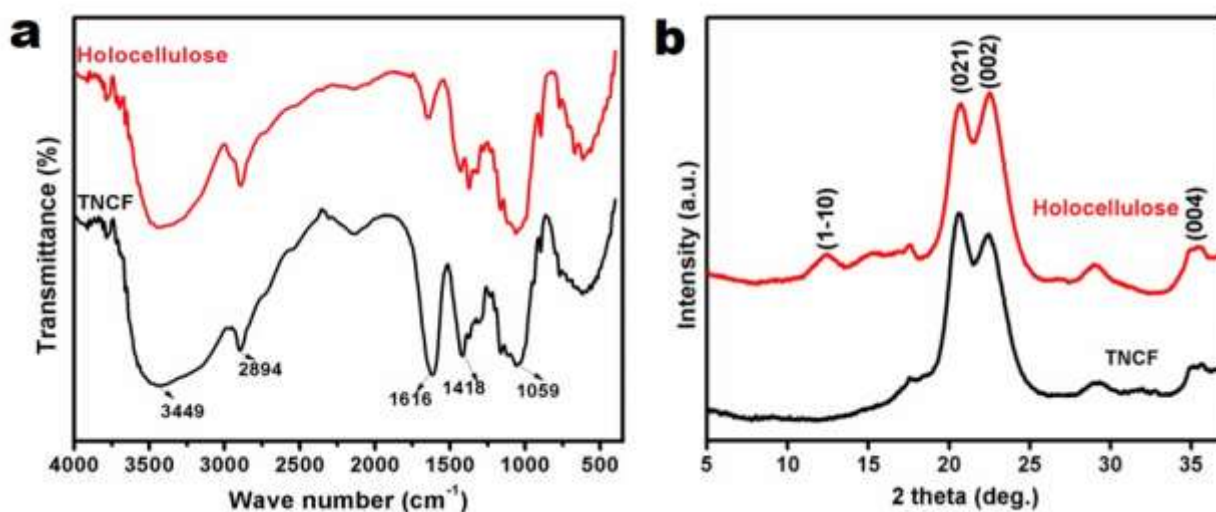

**Figure S2.** (a) FTIR spectra of holocellulose and TEMPO-oxidized nanocellulose, (b) WAXS pattern of holocellulose, and TEMPO-oxidized nanocellulose fibers.

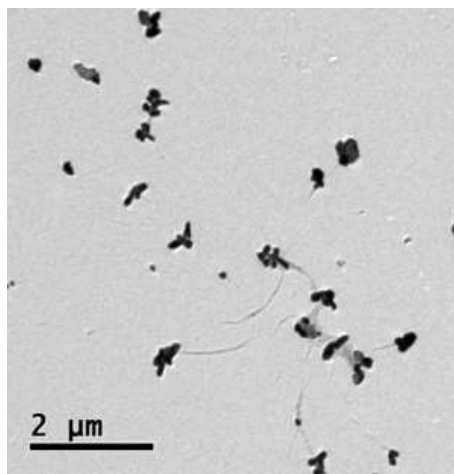

**Figure S3.** TEM image of AgNF over large area,

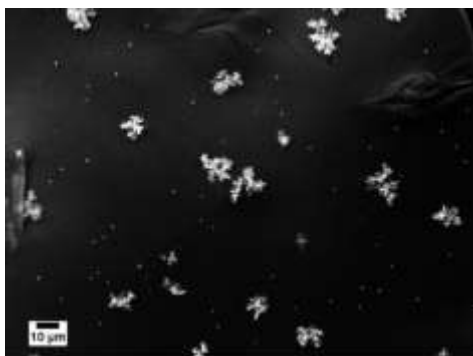

**Figure S4.** SEM micrograph of highly branched Ag morphology over large area at 0.5 mM  $\text{Ag}^+$  ion concentration.

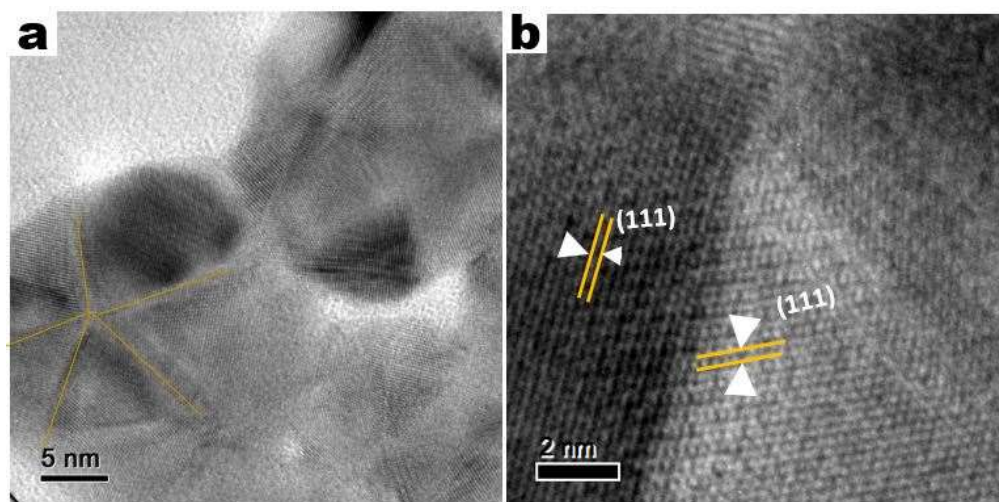

**Figure S5.** HR-TEM images (a), and (b) of multi-twinned Ag nanostructures formed for sample NC-0.06 at different magnifications

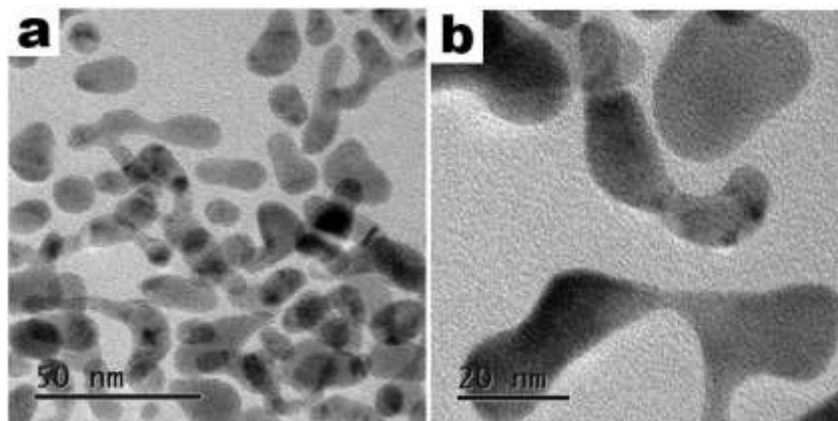

**Figure S6.** (a) TEM image of the formation of worm-like Ag nanostructure in the preliminary stage of AgNF formation, and b) corresponding higher magnification TEM image.

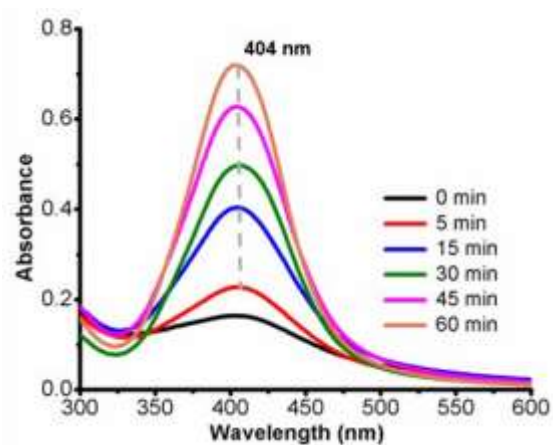

**Figure S7.** UV-vis spectra taken during the AgNF structure evolution study

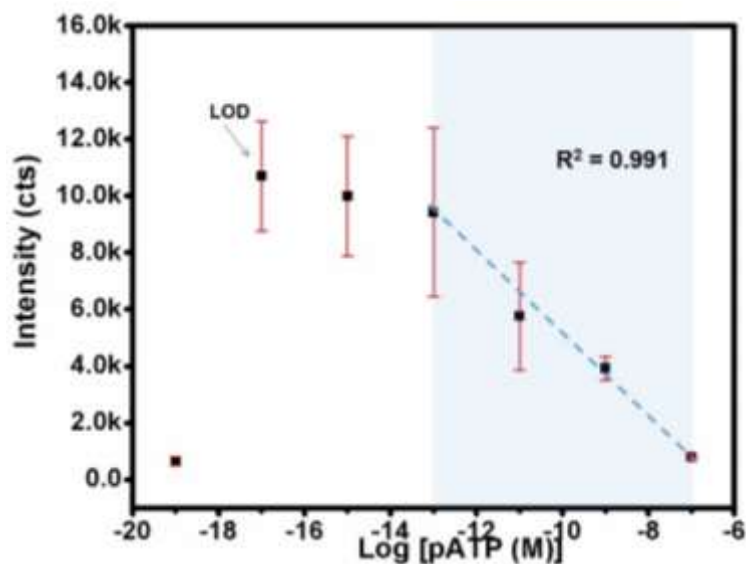

**Figure S8.** Concentration of pATP vs SERS intensity at  $1071\text{ cm}^{-1}$  plot. The linear regression plot with regression coefficient,  $R^2 = 0.991$  is shown for quantification region marked as blue area. The error bars calculated for spectra taken from 6 random spots in AgNFs substrate.

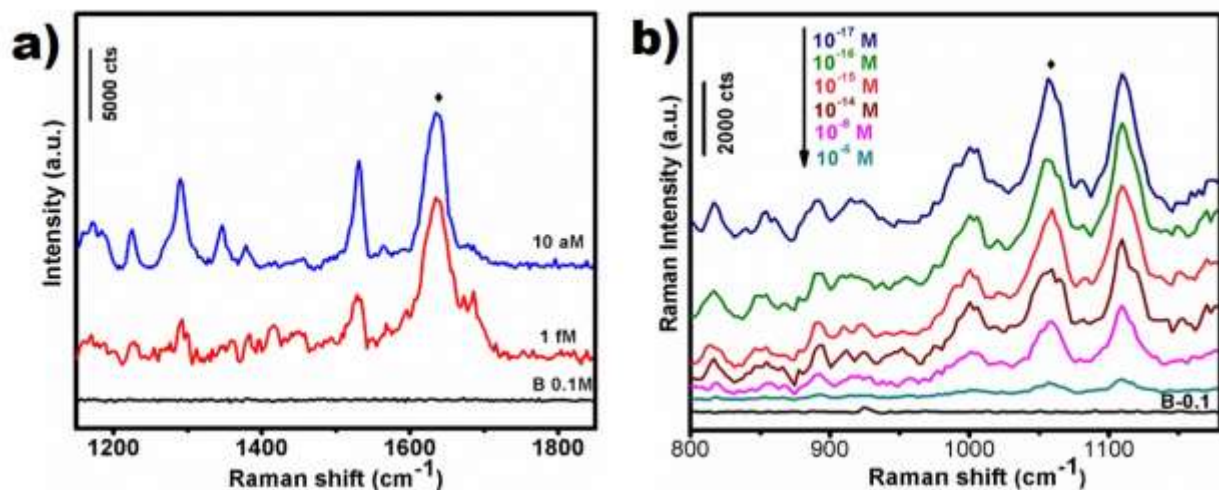

**Figure S9.** (a) Solid state SERS spectra of MB at different dilutions, and (b) liquid state SERS spectra of pATP

**Table S1.** An overview of reports on Ag nanostructures as SERS substrate with their lowest detection limit for pATP molecule.

| SERS substrate                              | Detection limit (M)     | Ref          |
|---------------------------------------------|-------------------------|--------------|
| Ag/TiO <sub>2</sub> /rGO nanocomposite      | 10 <sup>-14</sup>       | 1            |
| Ag nanopolyhedra on tapered fiber probe     | 10 <sup>-9</sup>        | 2            |
| Ag nanotriangle loaded film                 | 10 <sup>-8</sup>        | 3            |
| Assembled spherical AgNPs                   | 10 <sup>-10</sup>       | 4            |
| Ag/Au microtubes with sharp-edge nanosheets | 6.0 X 10 <sup>-10</sup> | 5            |
| Ag film                                     | 10 <sup>-11</sup>       | 6            |
| Ag on TiO <sub>2</sub> nanograss            | 10 <sup>-12</sup>       | 7            |
| AgNF/TNCF                                   | <10 <sup>-17</sup>      | Present work |

## References

1. Hsu, K.-C.; Chen, D.-H. Highly Sensitive, Uniform, and Reusable Surface-Enhanced Raman Scattering Substrate with TiO<sub>2</sub> Interlayer between Ag Nanoparticles and Reduced Graphene Oxide. *ACS Appl. Mater. Interfaces* **2015**, 7, 27571-27579.
2. Cao, J.; Wang, J. Development of Ag Nanopolyhedra Based Fiber-Optic Probes for High Performance SERS Detection. *New J. Chem.* **2015**, 39, 2421-2424.

3. Wang, C.; Liu, B.; Dou, X. Silver Nanotriangles-Loaded Filter Paper for Ultrasensitive SERS Detection Application Benefited by Interspending of Sharp Edges. *Sens. Actuators, B* **2016**, *231*, 357-364.
4. Liu, Y.; Zhang, Y.; Ding, H.; Xu, S.; Li, M.; Kong, F.; Luo, Y.; Li, G. Self-Assembly of Noble Metallic Spherical Aggregates from Monodisperse Nanoparticles: their Synthesis and Pronounced SERS and Catalytic Properties. *J. Mater. Chem. A* **2013**, *1*, 3362-3371.
5. Wang, T.; Hu, X.; Dong, S. A Renewable SERS Substrate Prepared by Cyclic Depositing and Stripping of Silver Shells on Gold Nanoparticle Microtubes. *Small* **2008**, *4*, 781-786.
6. Wang, Z.; Li, M.; Wang, W.; Fang, M.; Sun, Q.; Liu, C. Floating Silver Film: a Flexible Surface-Enhanced Raman Spectroscopy Substrate for Direct Liquid Phase Detection at Gas–Liquid Interfaces. *Nano Res.* **2016**, *9*, 1148-1158.
7. Xu, S.; Zhang, Y.; Luo, Y.; Wang, S.; Ding, H.; Xu, J.; Li, G. Ag-Decorated TiO<sub>2</sub> Nanograss for 3D SERS-Active Substrate with Visible Light Self-Cleaning and Reactivation. *Analyst* **2013**, *138*, 4519-4525.
